# Supplementary material
Source: Springer Nature journal article supplement (https://www.springermedizin.de/resource/supplementary/10194_2013_276_MOESM1_ESM.pdf/9422596)

### Pilot study

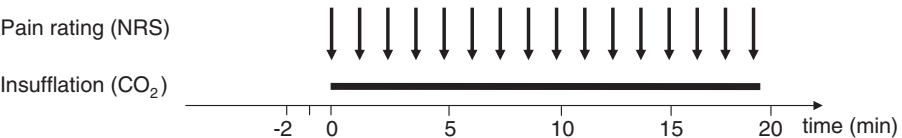

### Experiment 1

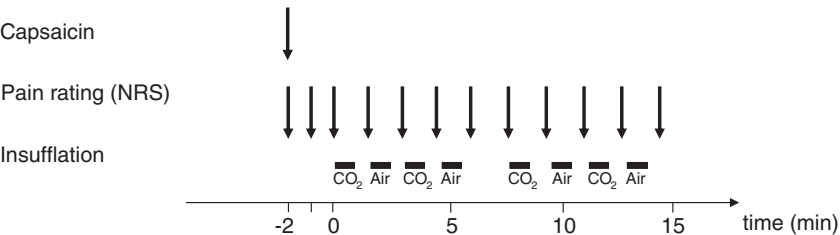

### Experiment 2

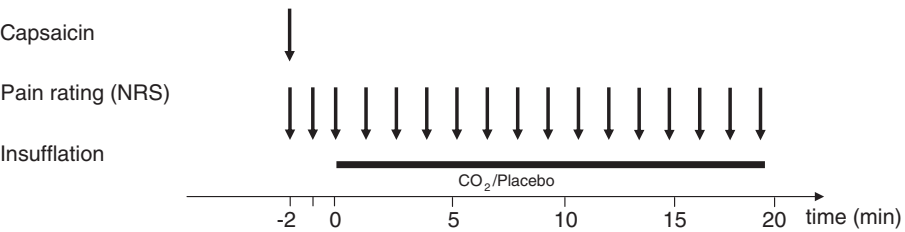

Supplement: MOESM1 [file 9422596]
